# Supplementary material
Source: HighWire-hosted journal article supplement (https://www.cmaj.ca/highwire/filestream/57784/field_highwire_adjunct_files/5/mat-online-appendix_6.pdf)
Supplement: mat-online-appendix_6.pdf [file mat-online-appendix_6.pdf]

## Appendix 6: Assessment of risk of bias

| Author                    | Type of study       | Compliance, %          | Sequence generation | Allocation concealment | Blinding of assessors, patients | Incomplete outcome data addressed | Free of selective reporting | Free of other bias | Overall |
|---------------------------|---------------------|------------------------|---------------------|------------------------|---------------------------------|-----------------------------------|-----------------------------|--------------------|---------|
| Christian <sup>1</sup>    | Cluster RCT         | 88                     | Yes                 | Yes                    | Yes                             | Yes                               | Yes                         | Yes                | Low     |
| Fawzi <sup>2</sup>        | RCT                 | 91                     | Unclear             | Unclear                | Yes                             | Yes                               | Yes                         | Yes                | Low     |
| Fawzi <sup>3</sup>        | RCT                 | 88                     | Unclear             | Unclear                | Yes                             | Yes                               | Yes                         | Yes                | Low     |
| Friis <sup>4</sup>        | RCT                 | 80                     | Yes                 | Yes                    | Yes                             | Yes                               | Yes                         | Yes                | None    |
| Gupta <sup>5</sup>        | RCT                 | 85–87                  | Yes                 | Yes                    | Yes                             | Yes                               | Yes                         | Yes                | None    |
| Hininger <sup>6</sup>     | RCT                 | > 80                   | Yes                 | Unclear                | Yes                             | Yes                               | Yes                         | Yes                | Low     |
| Kaestel <sup>7</sup>      | RCT                 | 76                     | Yes                 | Unclear                | Yes                             | Yes                               | Yes                         | Yes                | Low     |
| Osrin <sup>8</sup>        | RCT                 | 98                     | Yes                 | Yes                    | Yes                             | Yes                               | Yes                         | Yes                | None    |
| Ramakrishnan <sup>9</sup> | RCT                 | 94                     | Yes                 | Yes                    | Yes                             | Yes                               | Yes                         | Yes                | None    |
| Roberfroid <sup>10</sup>  | 2 x 2 factorial RCT | Direct observed intake | Yes                 | Yes                    | Yes                             | Yes                               | Yes                         | Yes                | None    |
| Shankar <sup>11</sup>     | Cluster RCT         | 84–85                  | Yes                 | Yes                    | Yes                             | Yes                               | Yes                         | Yes                | Low     |
| Zagre <sup>12</sup>       | Cluster RCT         | 78–79                  | Yes                 | Unclear                | Yes                             | Yes                               | Yes                         | Yes                | Low     |
| Zeng <sup>13</sup>        | Cluster RCT         | 92–93                  | Yes                 | Yes                    | Yes                             | Yes                               | Yes                         | Yes                | No      |

Note: RCT = randomized controlled trial.

### References

1. Christian P, Khatry SK, Katz J, et al. Effects of alternative maternal micronutrient supplements on low birth weight in rural Nepal: double blind randomised community trial. *BMJ* 2003;326:571.
2. Fawzi WW, Msamanga GI, Spiegelman D, et al. Randomised trial of effects of vitamin supplements on pregnancy outcomes and T cell counts in HIV-1-infected women in Tanzania. *Lancet* 1998;351:1477-82.
3. Fawzi WW, Msamanga GI, Urassa W, et al. Vitamins and perinatal outcomes among HIV-negative women in Tanzania. *N Engl J Med* 2007;356:1423-31.14.
4. Friis H, Gomo E, Nyazema N, et al. Effect of multimicronutrient supplementation on gestational length and birth size: a randomized, placebo-controlled, double-blind effectiveness trial in Zimbabwe. *Am J Clin Nutr* 2004;80:178-84.
5. Gupta P, Ray M, Dua T, et al. Multimicronutrient supplementation for undernourished pregnant women and the birth size of their offspring: a double-blind, randomized, placebo-controlled trial. *Arch Pediatr Adolesc Med* 2007;161:58-64.
6. Hininger I, Favier M, Arnaud J, et al. Effects of a combined micronutrient supplementation on maternal biological status and newborn anthropometrics measurements: a randomized double-blind, placebo-controlled trial in apparently healthy pregnant women. *Eur J Clin Nutr* 2004;58:52-9.
7. Kaestel P, Michaelsen KF, Aaby P, et al. Effects of prenatal multimicronutrient supplements on birth weight and perinatal mortality: a randomised, controlled trial in Guinea-Bissau. *Eur J Clin Nutr* 2005;59:1081-9.
8. Osrin D, Vaidya A, Shrestha Y, et al. Effects of antenatal multiple micronutrient supplementation on birthweight and gestational duration in Nepal: double-blind, randomised controlled trial. *Lancet* 2005;365:916-7.
9. Ramakrishnan U, Gonzalez-Cossio T, Neufeld LM, et al. Multiple micronutrient supplementation during pregnancy does not lead to greater infant birth size than does iron-only supplementation: a randomized controlled trial in a semirural community in Mexico. *Am J Clin Nutr* 2003;77:720-5.
10. Roberfroid D, Huybregts L, Lanou H, et al. Effects of maternal multiple micronutrient supplementation on fetal growth: a double-blind randomized controlled trial in rural Burkina Faso. *Am J Clin Nutr* 2008;88:1330-40.
11. Shankar AH, Jahari AB, Sebayang SK, et al. Effect of maternal multiple micronutrient supplementation on fetal loss and infant death in Indonesia: a double-blind cluster-randomised trial. *Lancet* 2008;371:215-27.
12. Zagre NM, Desplats G, Adou P, et al. Prenatal multiple micronutrient supplementation has greater impact on birthweight than supplementation with iron and folic acid: a cluster-randomized, double-blind, controlled programmatic study in rural Niger. *Food Nutr Bull* 2007;28:317-27.
13. Zeng L, Dibley MJ, Cheng Y, et al. Impact of micronutrient supplementation during pregnancy on birth weight, duration of gestation, and perinatal mortality in rural western China: double blind cluster randomised controlled trial. *BMJ* 2008;337:a2001.
